# Supplementary material for: Infrared sensitive mixed phase of V7O16 and V2O5 thin-films
Source: Royal Society of Chemistry journal article supplement (doi:10.1039/d3ra00752a), 2023-01-01
Supplement: d3ra00752a1.pdf [file d3ra00752a1.pdf]

## Supplementary Information

### Infrared Sensitive Mixed Phase of $V_7O_{16}$ and $V_2O_5$ Thin-Films

Anchal Rana<sup>1</sup>, Aditya Yadav<sup>2</sup>, Govind Gupta<sup>2</sup>, Abhimanyu Rana<sup>1\*</sup>

<sup>1</sup>Centre for Advanced Materials and Devices, School of Engineering and Technology, BML Munjal University, Sidhrawali, Gurugram-122413, Haryana, India

<sup>2</sup>CSIR-National Physical Laboratory, K.S. Krishnan Marg, New Delhi, 110012, India

\*rana.abhimanyu@gmail.com

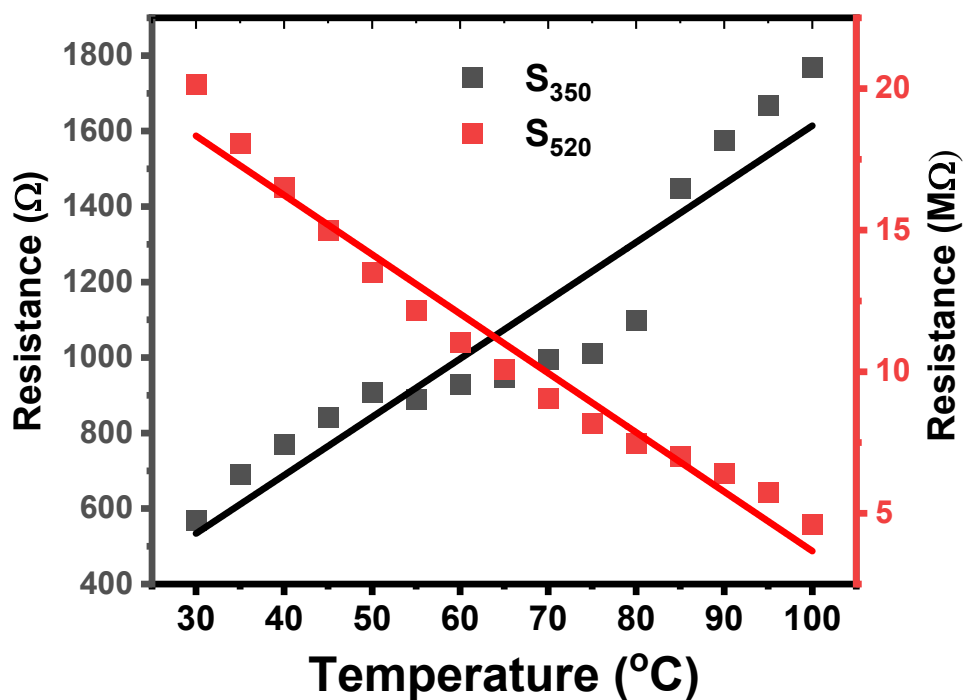

Figure S1: Resistance versus temperature curve for mixed phase and  $V_2O_5$

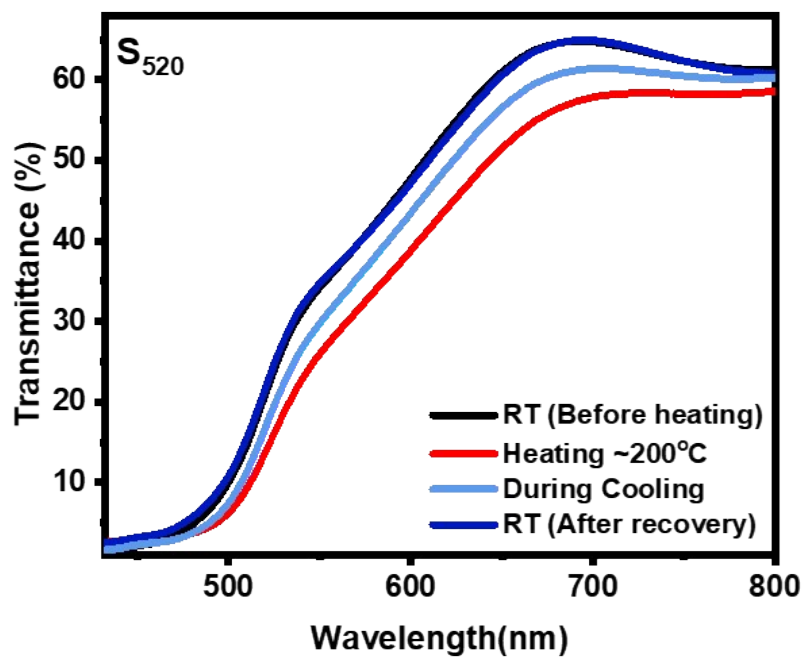

Figure S2: UV-spectra of the of V<sub>2</sub>O<sub>5</sub> thin-films before and after heating at 200 °C
